# Supplementary material for: Single-cell transcriptional profiles in human skeletal muscle
Source: Sci Rep. 2020 Jan 14;10:229. doi: 10.1038/s41598-019-57110-6 (PMC6959232; doi:10.1038/s41598-019-57110-6)
Supplement: Supplementary file 5 — Supplementary Table S4. [file 41598_2019_57110_MOESM5_ESM.xlsx]

## Sheet: Supplementary Table S2
Table S4: Fiber-type marker genes. Each row represents one fiber-type marker gene. Columns represent HGNC gene symbol (A), fiber-type marked by the marker gene (B), log2 fold change of the marker gene for its fiber-type vs. the second fiber-type (C), adjusted p-value for the differential expression of marker gene for its fiber vs. the second fiber (D), reference number for previous documentation …
Gene	Muscle.Fiber.Type	log2 fold-change (vs. opposite fiber-type)	padj	Previous documentation as fiber-type specific
ANKRD2	Type I	1.30428	0.177642	1
ATP2A2	Type I	3.1221	5.18e-05	2
CA3	Type I	1.18831	0.016113	3
CASQ2	Type I	1.85939	0.000101383	4
CD36	Type I	1.13794	0.00798805	5
CYB5R1	Type I	1.34012	4.86e-07
FABP3	Type I	1.10525	0.0758365	5
LDHB	Type I	2.58985	9.4e-07	5
MYH7	Type I	3.19114	0.0170304	6
MYL12A	Type I	1.32407	0.0192218
MYL2	Type I	3.28876	0.00160913	6
MYL3	Type I	3.50245	0.00622412	6
MYL6B	Type I	2.71023	2.17e-05	7
MYOZ2	Type I	3.18363	3.97e-05	8
PDLIM1	Type I	2.58597	6.44e-09	9
PLN	Type I	0.956862	0.114427	10
TNNC1	Type I	3.35018	0.000190532	6
TNNI1	Type I	3.24494	0.00219742	6
TNNT1	Type I	3.46946	0.000435711	6
TPM3	Type I	3.67694	0.00316985	6
ALDOA	Type IIa	1.7323	3.08e-06
ATP2A1	Type IIa	2.64579	1.5e-05	2
DDIT4L	Type IIa	0.97012	0.270129
ENO3	Type IIa	1.66919	5.35e-06	11
G0S2	Type IIa	1.05395	0.222719
GAPDH	Type IIa	1.31734	0.00279065	12
LDHA	Type IIa	1.56951	0.00318865	5
MYBPC2	Type IIa	3.10626	2.67e-07	5
MYH1	Type IIa	1.72177	0.349993	6
MYH2	Type IIa	3.6653	0.000627124	6
MYL1	Type IIa	1.59154	0.0448291	2
MYLPF	Type IIa	3.13546	0.00490973	5
PFKM	Type IIa	1.45363	2.75e-07	11
PGM1	Type IIa	1.02694	0.00164515
PKM	Type IIa	1.31394	4.17e-08
SLN	Type IIa	1.55933	0.0441564	10
TNNC2	Type IIa	2.85931	0.00893985	6
TNNI2	Type IIa	3.43251	0.00497531	6
TNNT3	Type IIa	3.81017	0.00546602	6
TPM1	Type IIa	3.63076	0.00164515	6
References
1. Pallavicini, A. et al. Characterization of human skeletal muscle Ankrd2. Biochem. Biophys. Res. Commun. 285, 378-386 (2001).
2. Wu, K. D. & Lytton, J. Molecular cloning and quantification of sarcoplasmic reticulum Ca(2+)-ATPase isoforms in rat muscles. Am. J. Physiol. 264, C333-41 (1993).
3. Zheng, A. et al. Quantification of carbonic anhydrase III and myoglobin in different fiber types of human psoas muscle. Histochemistry 97, 77-81 (1992).
4. Yano, K. & Zarain-Herzberg, A. Sarcoplasmic reticulum calsequestrins: structural and functional properties. Mol. Cell. Biochem. 135, 61-70 (1994).
5. Lynch, C. J., Xu, Y., Hajnal, A., Salzberg, A. C. & Kawasawa, Y. I. RNA sequencing reveals a slow to fast muscle fiber type transition after olanzapine infusion in rats. PLoS ONE 10, e0123966 (2015).
6. Tajsharghi, H. Thick and thin filament gene mutations in striated muscle diseases. Int. J. Mol. Sci. 9, 1259-1275 (2008).
7. Hailstones, D. L. & Gunning, P. W. Characterization of human myosin light chains 1sa and 3nm: implications for isoform evolution and function. Mol. Cell. Biol. 10, 1095-1104 (1990).
8. Frey, N. et al. Calsarcin-2 deficiency increases exercise capacity in mice through calcineurin/NFAT activation. J. Clin. Invest. 118, 3598-3608 (2008).
9. Chemello, F. et al. Microgenomic analysis in skeletal muscle: expression signatures of individual fast and slow myofibers. PLoS ONE 6, e16807 (2011).
10. Stammers, A. N. et al. The regulation of sarco(endo)plasmic reticulum calcium-ATPases (SERCA). Can. J. Physiol. Pharmacol. 93, 843-854 (2015).
11. Chao, L. C. et al. Nur77 coordinately regulates expression of genes linked to glucose metabolism in skeletal muscle. Mol. Endocrinol. 21, 2152-2163 (2007).
12. Galpin, A.J. et al. Human skeletal muscle fiber type specific protein content. Anal. Biochem. 425, 175-182 (2012).
